# Supplementary material for: Effects of Cadmium Exposure on Lactating Mice and Rats: A Systematic Review of Breastfeeding Experiments
Source: MDPI journal article supplement (doi:10.3390/app122211412), 2022-11-10
Supplement: s1 [file s1]

# Supplementary Figure

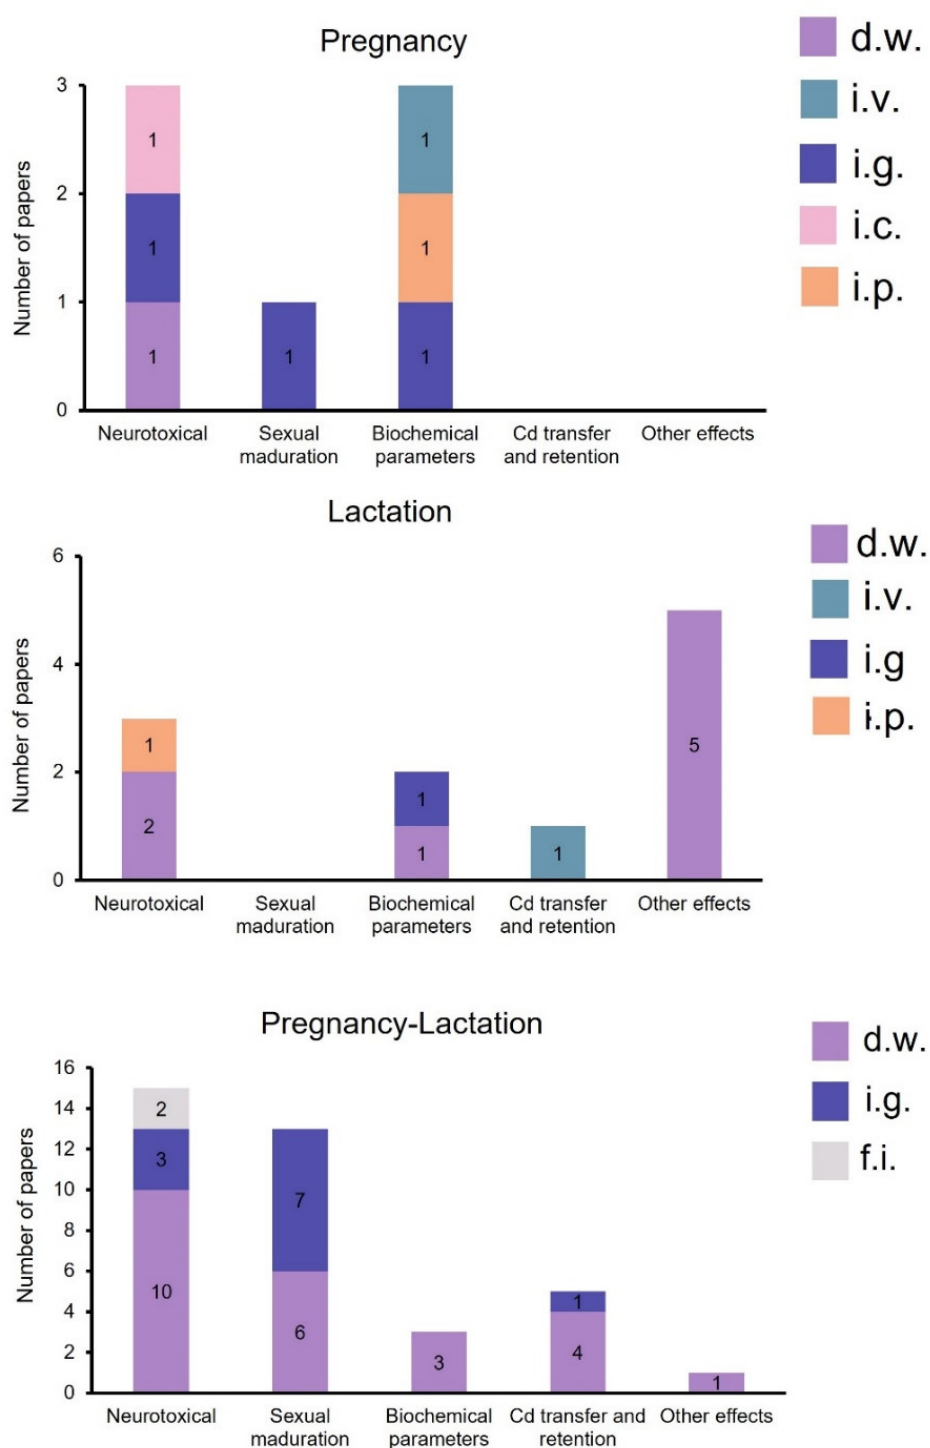

**Figure S1.** Administration route, Cd-exposure scheme, and effects evaluated. Graphs represent the frequency of papers reporting each administration route during pregnancy, lactation, or pregnancy-lactation scheme, as well as the effect evaluated. D.w., drinking water; i.g., intragastric; i.p., intraperitoneal; i.v., intravenous; f.i., food intake; i.c., inhalation chamber.
